# Supplementary material for: Biomimetic PLGA/Strontium-Zinc Nano Hydroxyapatite Composite Scaffolds for Bone Regeneration
Source: MDPI journal article supplement (doi:10.3390/jfb13010013), 2022-01-28
Supplement: s1 [file s1]

Supplementary

# Biomimetic PLGA/Strontium-Zinc Nano Hydroxyapatite Composite Scaffolds for Bone Regeneration

Mozan Hassan <sup>1,†</sup>, Mohsin Sulaiman <sup>1,†</sup>, Priya Dharshini Yuvaraju <sup>2</sup>, Emmanuel Galiwango <sup>3,4</sup>,  
Ihtesham ur Rehman <sup>5</sup>, Ali H. Al-Marzouqi <sup>3</sup>, Abbas Khaleel <sup>6</sup> and Sahar Mohsin <sup>1,\*</sup>

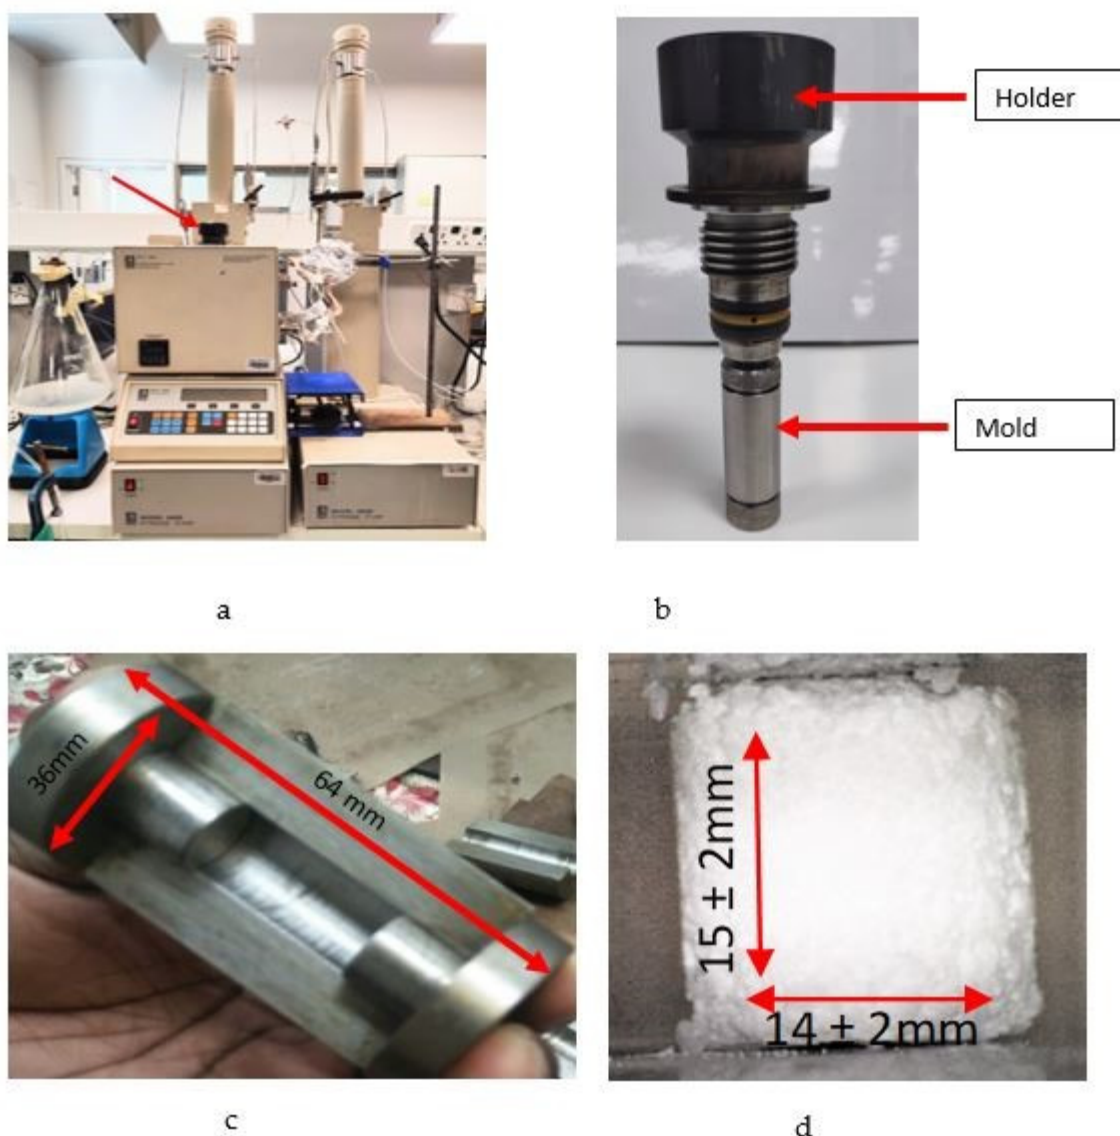

**Figure S1.** Showing apparatus used for the ScCO<sub>2</sub> system. (a) ISCO SFX-220 extraction system red arrows shows the holder with a mold containing a sample. (b) Holder with a mold for placing a sample. (c) Mold use for making scaffolds. (d) Scaffolds prepared for compression testing.

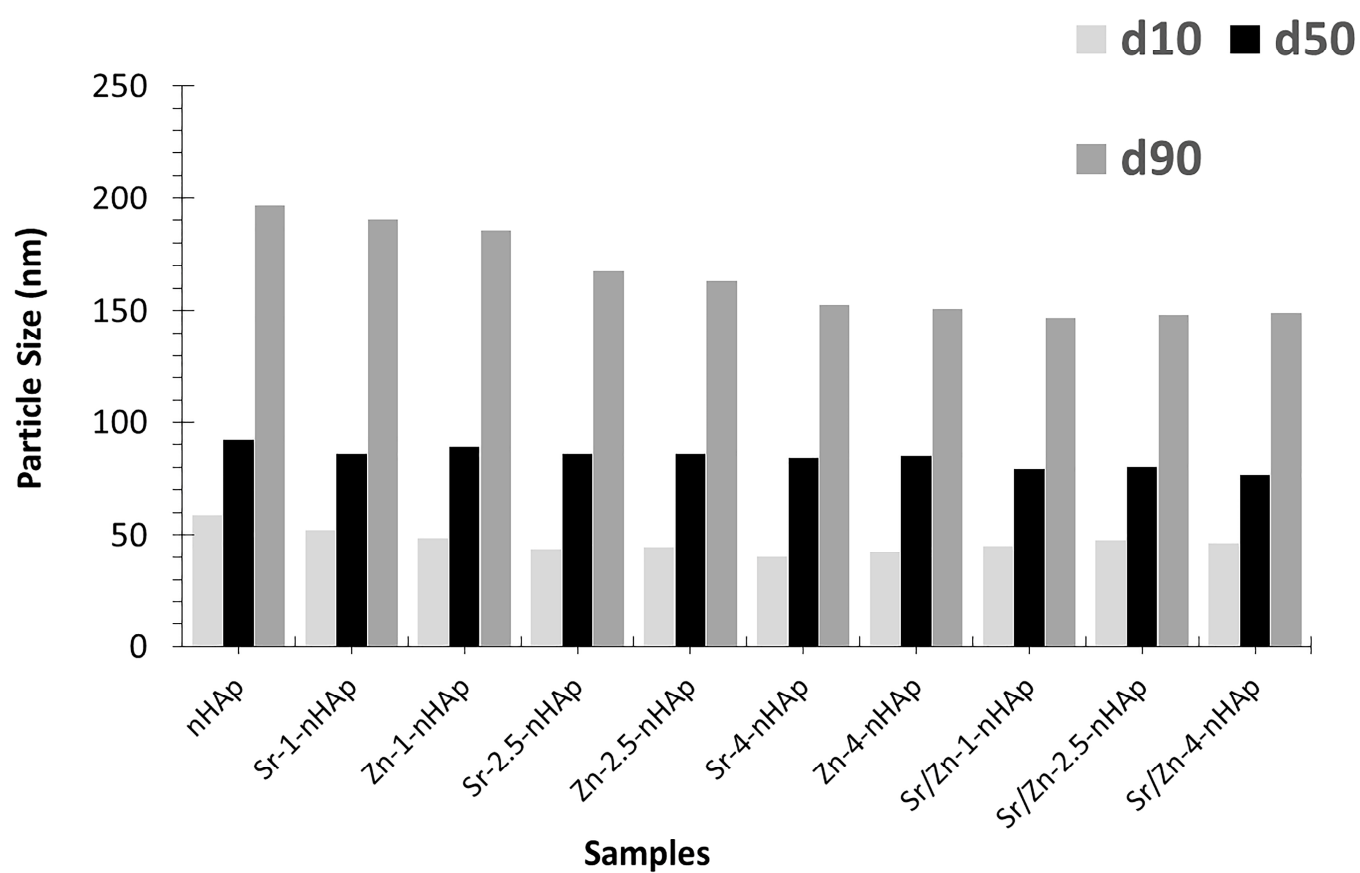

Figure S2. Particle size bar diagram.
